# Supplementary material for: Social Outbreak in Chile, and Its Association with the Effects Biological, Psychological, Social, and Quality of Life
Source: MDPI journal article supplement (doi:10.3390/ijerph20237096), 2023-11-22
Supplement: s1 [file s1]

## Supplementary Materials

**Supplementary Figure S1. Frequency effect**

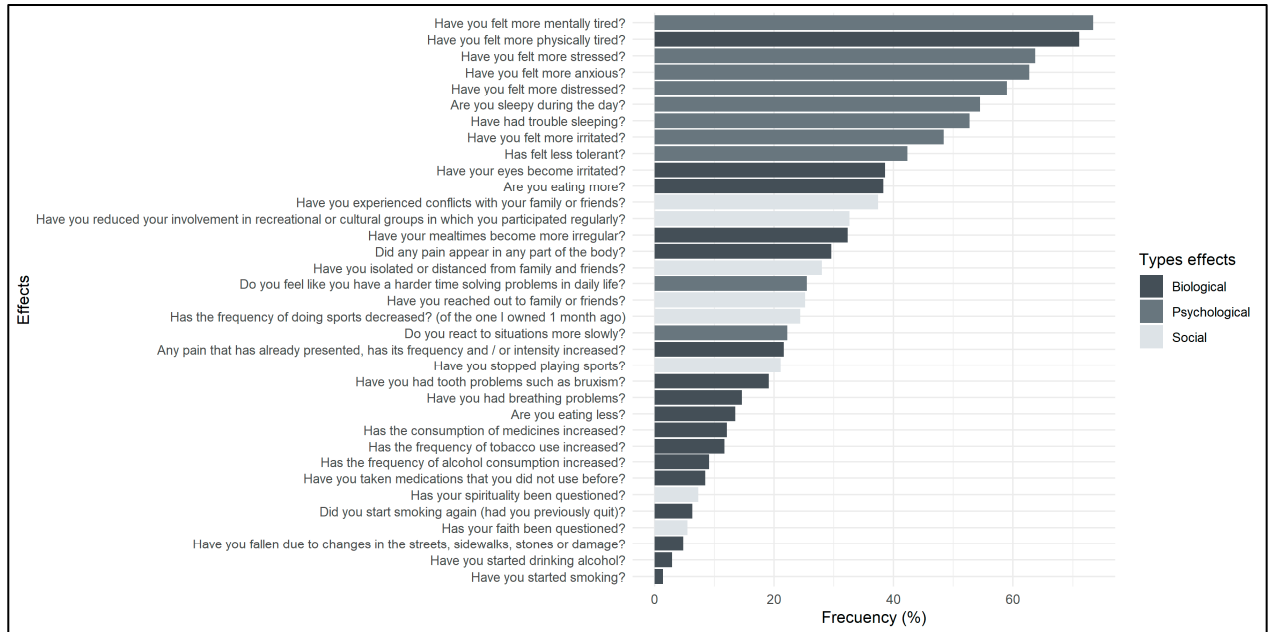

Data are presented in percentage.

**Supplementary Table S1. Association biological effects and exposition**

|                                                                                            | Overall     | No exposition | Medium exposition | Higher exposition | p-Value |
|--------------------------------------------------------------------------------------------|-------------|---------------|-------------------|-------------------|---------|
| <b>Symptomatology (%)</b>                                                                  |             |               |                   |                   |         |
| Have you felt more physically tired? (Yes)                                                 | 1884 (71.1) | 217 (11.5)    | 1163 (61.7)       | 504 (26.8)        | <0.001  |
| Have your eyes become irritated? (Yes)                                                     | 1023 (38.6) | 81 (7.9)      | 629 (61.5)        | 313 (30.6)        | <0.001  |
| Are you eating more? (Yes)                                                                 | 1016 (38.3) | 135 (13.3)    | 614 (60.4)        | 267 (26.3)        | 0.022   |
| Have your mealtimes become more irregular? (Yes)                                           | 856 (32.3)  | 84 (9.8)      | 520 (60.7)        | 252 (29.5)        | <0.001  |
| Did any pain appear in any part of the body? (Yes)                                         | 784 (29.6)  | 82 (10.5)     | 466 (59.4)        | 236 (30.1)        | <0.001  |
| Any pain that has already presented, has its frequency and / or intensity increased? (Yes) | 573 (21.6)  | 66 (11.5)     | 341 (59.5)        | 166 (29.0)        | 0.001   |
| Have you had tooth problems such as bruxism? (Yes)                                         | 506 (19.1)  | 57 (11.3)     | 291 (57.5)        | 158 (31.2)        | <0.001  |
| Have you had breathing problems? (Yes)                                                     | 388 (14.6)  | 45 (11.6)     | 209 (53.9)        | 134 (34.5)        | <0.001  |
| Are you eating less? (Yes)                                                                 | 357 (13.5)  | 23 (6.4)      | 228 (63.9)        | 106 (29.7)        | <0.001  |

|                                                                                   |            |           |            |            |        |
|-----------------------------------------------------------------------------------|------------|-----------|------------|------------|--------|
| Has the consumption of medicines increased? (Yes)                                 | 322 (12.1) | 32 (9.9)  | 173 (53.7) | 117 (36.4) | <0.001 |
| Has the frequency of tobacco use increased? (Yes)                                 | 309 (11.7) | 33 (10.7) | 184 (59.5) | 92 (29.8)  | 0.008  |
| Has the frequency of alcohol consumption increased? (Yes)                         | 241 (9.1)  | 19 (7.9)  | 153 (63.5) | 69 (28.6)  | 0.004  |
| Have you taken medications that you did not use before? (Yes)                     | 225 (8.5)  | 29 (12.9) | 111 (49.3) | 85 (37.8)  | <0.001 |
| Did you start smoking again (had you previously quit)? (Yes)                      | 166 (6.3)  | 18 (10.8) | 98 (59.0)  | 50 (30.2)  | 0.076  |
| Have you fallen due to changes in the streets, sidewalks, stones or damage? (Yes) | 128 (4.8)  | 10 (7.8)  | 63 (49.2)  | 55 (43.0)  | <0.001 |
| Have you started drinking alcohol? (Yes)                                          | 76 (2.9)   | 6 (7.9)   | 47 (61.8)  | 23 (30.3)  | 0.146  |
| Have you started smoking? (Yes)                                                   | 38 (1.4)   | 5 (13.2)  | 21 (55.3)  | 12 (31.5)  | 0.496  |

**Supplementary Table S2. Association psychological effects and exposition**

| <b>Symptomatology (%)</b>                                                     | <b>Overall</b> | <b>No exposition</b> | <b>Medium exposition</b> | <b>Higher exposition</b> | <b>p-Value</b> |
|-------------------------------------------------------------------------------|----------------|----------------------|--------------------------|--------------------------|----------------|
| Have you felt more mentally tired? (Yes)                                      | 1946 (73.4)    | 230 (11.8)           | 1206 (62.0)              | 510 (26.2)               | <0.001         |
| Have you felt more stressed? (Yes)                                            | 1690 (63.7)    | 195 (11.6)           | 1040 (61.5)              | 455 (26.9)               | <0.001         |
| Have you felt more anxious? (Yes)                                             | 1662 (62.7)    | 205 (12.3)           | 1022 (61.5)              | 435 (26.2)               | <0.001         |
| Have you felt more distressed? (Yes)                                          | 1564 (59.0)    | 212 (13.6)           | 941 (60.2)               | 411 (26.2)               | <0.001         |
| Are you sleepy during the day? (Yes)                                          | 1445 (54.5)    | 171 (11.8)           | 882 (61.0)               | 392 (27.2)               | <0.001         |
| Have had trouble sleeping? (Yes)                                              | 1396 (52.7)    | 173 (12.4)           | 849 (60.8)               | 374 (26.8)               | <0.001         |
| Have you felt more irritated? (Yes)                                           | 1282 (48.4)    | 152 (11.9)           | 784 (61.1)               | 346 (27.0)               | <0.001         |
| Has felt less tolerant? (Yes)                                                 | 1122 (42.3)    | 142 (12.7)           | 668 (59.5)               | 312 (27.8)               | <0.001         |
| Do you feel like you have a harder time solving problems in daily life? (Yes) | 675 (25.5)     | 88 (13.0)            | 384 (56.9)               | 203 (30.1)               | <0.001         |
| Do you react to situations more slowly? (Yes)                                 | 589 (22.2)     | 57 (9.7)             | 361 (61.3)               | 171 (29.0)               | <0.001         |

**Supplementary Table S3. Association social effects and exposition**

| <b>Symptomatology (%)</b>                                                                                       | <b>Overall</b> | <b>No exposition</b> | <b>Medium exposition</b> | <b>Higher exposition</b> | <b>p-Value</b> |
|-----------------------------------------------------------------------------------------------------------------|----------------|----------------------|--------------------------|--------------------------|----------------|
| Have you experienced conflicts with your family or friends? (Yes)                                               | 991 (37.4)     | 139 (14.0)           | 599 (60.4)               | 253 (25.6)               | 0.163          |
| Have you reduced your involvement in recreational or cultural groups in which you participated regularly? (Yes) | 865 (32.6)     | 109 (12.6)           | 502 (58.0)               | 254 (29.4)               | <0.001         |

|                                                                                     |            |           |            |            |        |
|-------------------------------------------------------------------------------------|------------|-----------|------------|------------|--------|
| Have you isolated or distanced from family and friends? (Yes)                       | 742 (28.0) | 99 (13.3) | 421 (56.7) | 222 (30.0) | <0.001 |
| Have you reached out to family or friends? (Yes)                                    | 669 (25.2) | 69 (10.3) | 431 (64.4) | 169 (25.3) | 0.002  |
| Has the frequency of doing sports decreased? (of the one I owned 1 month ago) (Yes) | 647 (24.4) | 72 (11.1) | 395 (61.1) | 180 (27.8) | 0.001  |
| Have you stopped playing sports? (Yes)                                              | 560 (21.1) | 53 (9.5)  | 341 (60.9) | 166 (29.6) | <0.001 |
| Has your spirituality been questioned? (Yes)                                        | 194 (7.3)  | 26 (13.4) | 116 (59.8) | 52 (26.8)  | 0.521  |
| Has your faith been questioned? (Yes)                                               | 147 (5.5)  | 27 (18.4) | 78 (53.1)  | 42 (28.5)  | 0.068  |

Supplementary Table S4. Characteristics by effect in QoL

|                            | Overall       | Not affected at all / little | Somewhat      | To a great extent / extremely | p-Value |
|----------------------------|---------------|------------------------------|---------------|-------------------------------|---------|
| <b>n</b>                   | 2651          | 790 (29.8)                   | 1064 (40.1)   | 797 (30.1)                    |         |
| <b>Sex (%)</b>             |               |                              |               |                               |         |
| Man                        | 774 (29.2)    | 293 (37.9)                   | 294 (38.0)    | 187 (24.1)                    | <0.001  |
| Woman                      | 1877 (70.8)   | 497 (26.5)                   | 770 (41.0)    | 610 (32.5)                    |         |
| <b>Age (mean (SD))</b>     | 35.22 (11.30) | 33.73 (10.70)                | 34.79 (10.86) | 37.27 (12.16)                 | <0.001  |
| <b>Education (%)</b>       |               |                              |               |                               |         |
| Up to high school          | 96 (3.6)      | 26 (27.1)                    | 33 (34.4)     | 37 (38.5)                     | 0.181   |
| Incomplete College         | 108 (4.1)     | 33 (30.6)                    | 34 (31.5)     | 41 (37.9)                     |         |
| College / technical Degree | 2447 (92.3)   | 731 (29.9)                   | 997 (40.7)    | 719 (29.4)                    |         |
| <b>Occupation (%)</b>      |               |                              |               |                               |         |
| Inactive                   | 155 (5.8)     | 37 (23.9)                    | 54 (34.8)     | 64 (41.3)                     | 0.001   |
| Employer                   | 157 (5.9)     | 33 (21.0)                    | 57 (36.3)     | 67 (42.7)                     |         |
| Student                    | 315 (11.9)    | 89 (28.3)                    | 133 (42.2)    | 93 (29.5)                     |         |
| Worker                     | 1462 (55.1)   | 446 (30.5)                   | 596 (40.8)    | 420 (28.7)                    |         |
| Independent                | 562 (21.3)    | 185 (32.9)                   | 224 (39.9)    | 153 (27.2)                    |         |
| <b>Zone (%)</b>            |               |                              |               |                               |         |
| North                      | 229 (8.6)     | 59 (25.8)                    | 82 (35.8)     | 88 (38.4)                     | <0.001  |
| Centre                     | 716 (27.0)    | 159 (22.2)                   | 251 (35.1)    | 306 (42.7)                    |         |
| South                      | 280 (10.6)    | 49 (17.5)                    | 127 (45.4)    | 104 (37.1)                    |         |
| Metropolitan region        | 1426 (53.8)   | 530 (37.2)                   | 330 (23.1)    | 566 (39.7)                    |         |

Supplementary Table S5: Association Place exposition and effect in QoL

|                                             | Overall    | Not affected at all / little | Somewhat   | To a great extent / Extremely | OR 95% CI         | p-Value |
|---------------------------------------------|------------|------------------------------|------------|-------------------------------|-------------------|---------|
| <b>Closeness disturbs home (%)</b>          |            |                              |            |                               |                   |         |
| At the disturb place                        | 228 (8.6)  | 27 (11.8)                    | 54 (23.7)  | 147 (64.5)                    | 5.72 (3.54; 9.23) | <0.001  |
| 2-3 block from disturbs.                    | 491 (18.5) | 109 (22.2)                   | 197 (40.1) | 185 (37.7)                    | 2.85 (2.04; 3.98) | <0.001  |
| 4-5 blocks from disturbs                    | 913 (34.4) | 266 (29.2)                   | 401 (43.9) | 246 (26.9)                    | 1.95 (1.45; 2.61) | <0.001  |
| Far away from disturbs.                     | 759 (28.6) | 277 (36.5)                   | 315 (41.5) | 167 (22.0)                    | 1.41 (1.05; 1.90) | 0.022   |
| In an area where there were no disturbances | 260 (9.9)  | 111 (42.7)                   | 97 (37.3)  | 52 (20.0)                     | 1.00 (Ref.)       |         |
| <b>Closeness disturbs work (%)</b>          |            |                              |            |                               |                   |         |
| At the disturb place                        | 394 (14.9) | 91 (23.1)                    | 167 (42.4) | 136 (34.5)                    | 2.92 (2.02; 4.22) | <0.001  |
| 2-3 block from disturbs                     |            |                              |            |                               |                   |         |

|                                             |            |            |            |            |                   |        |
|---------------------------------------------|------------|------------|------------|------------|-------------------|--------|
|                                             | 662 (25.0) | 171 (25.8) | 272 (41.1) | 219 (33.1) | 2.40 (1.72; 3.34) | <0.001 |
| 4-5 blocks from disturbs                    | 665 (25.1) | 187 (28.1) | 286 (43.0) | 192 (28.9) | 2.10 (1.51; 2.91) | <0.001 |
| Far away from disturbs.                     | 591 (22.3) | 206 (34.9) | 239 (40.4) | 146 (24.7) | 1.56 (1.13; 2.17) | 0.008  |
| In an area where there were no disturbances | 209 (7.9)  | 94 (45.0)  | 61 (29.2)  | 54 (25.8)  | 1.00 (Ref.)       |        |
| No work, no study                           | 130 (4.8)  | 41 (31.5)  | 39 (30.0)  | 50 (38.5)  | 1.01 (0.60; 1.69) | 0.975  |
| <b>Closeness disturbs shop (%)</b>          |            |            |            |            |                   |        |
| At the disturb place                        | 856 (32.3) | 213 (24.9) | 332 (38.8) | 311 (36.3) | 3.65 (2.38; 5.61) | <0.001 |
| 2-3 block from disturbs                     | 720 (27.2) | 208 (28.9) | 309 (42.9) | 203 (28.2) | 2.87 (1.87; 4.42) | <0.001 |
| 4-5 blocks from disturbs                    | 551 (20.8) | 171 (31.0) | 228 (41.4) | 152 (27.6) | 2.28 (1.47; 3.53) | <0.001 |
| Far away from disturbs                      | 420 (15.8) | 146 (34.7) | 165 (39.3) | 109 (26.0) | 1.92 (1.23; 3.01) | 0.004  |
| In an area where there were no disturbances | 104 (3.9)  | 52 (50.0)  | 30 (28.8)  | 22 (21.2)  | 1.00 (Ref.)       |        |

Data presented as frequency and percentage, and Odds Ratio (OR) with their 95% Confidence Interval (CI). Model adjusted by sex, age, region, education and occupation.

**Supplementary Figure S2. Frequency disturbs (A) and resources for information (B).**

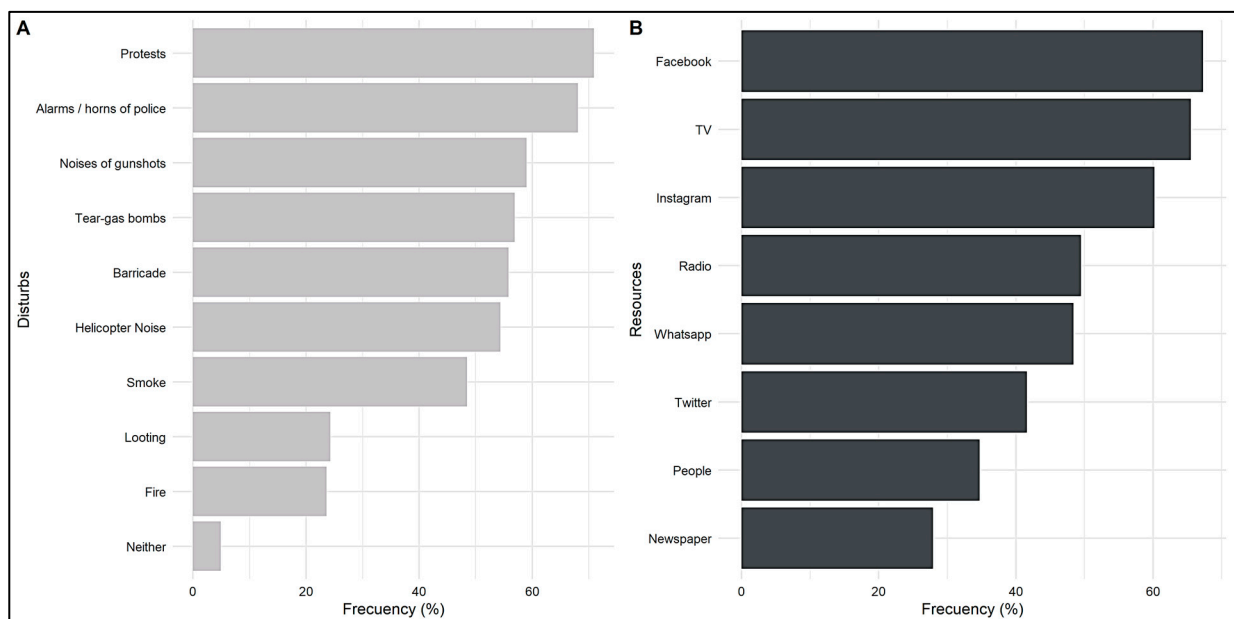

Data are presented in percentage.
